# 1 **ACE2-Targeting Monoclonal Antibody as Potent and Broad-** 2 **Spectrum Coronavirus Blocker**

3

4 Yuning Chen<sup>1,7,\*</sup>, Yanan Zhang<sup>2,7,\*</sup>, Renhong Yan<sup>3,\*</sup>, Guifeng Wang<sup>1,\*</sup>,  
5 Yuanyuan Zhang<sup>3</sup>, Zherui Zhang<sup>2,7</sup>, Yaning Li<sup>5</sup>, Jianxia Ou<sup>8</sup>, Wendi Chu<sup>1,7</sup>,  
6 Zhijuan Liang<sup>1,7</sup>, Yongmei Wang<sup>1,7</sup>, Yili Chen<sup>4</sup>, Ganjun Chen<sup>4</sup>, Qi Wang<sup>1</sup>,  
7 Qiang Zhou<sup>3†</sup>, Bo Zhang<sup>2,6†</sup>, Chunhe Wang<sup>1,4,7,8,9†</sup>

8

## 9 **Affiliations:**

10 <sup>1</sup>Biotherapeutics Discovery Research Center, Shanghai Institute of Materia Medica,  
11 Chinese Academy of Sciences, Shanghai 200126, China;

12 <sup>2</sup>Key Laboratory of Special Pathogens and Biosafety, Wuhan Institute of Virology,  
13 Center for Biosafety Mega-Science, Chinese Academy of Sciences, Wuhan, Hubei  
14 430071, China;

15 <sup>3</sup>Center for Infectious Disease Research, Westlake Laboratory of Life Sciences and  
16 Biomedicine, Key Laboratory of Structural Biology of Zhejiang Province, School of  
17 Life Sciences, Westlake University, and Institute of Biology, Westlake Institute for  
18 Advanced Study, 18 Shilongshan Road, Hangzhou, Zhejiang 310024, China;

19 <sup>4</sup>Dartsbio Pharmaceuticals, Zhongshan, Guangdong 528400, China;

20 <sup>5</sup>Beijing Advanced Innovation Center for Structural Biology, Tsinghua-Peking Joint  
21 Center for Life Sciences, School of Life Sciences, Tsinghua University, Beijing 100084,  
22 China;

23 <sup>6</sup>Drug Discovery Center for Infectious Disease, Nankai University, Tianjin 300350,  
24 China;

25 <sup>7</sup>University of Chinese Academy of Sciences, Beijing 100049, China;

26 <sup>8</sup>School of Chinese Materia Medica, Nanjing University of Chinese Medicine, Nanjing,  
27 Jiangsu 210023, China;

28 <sup>9</sup>Fudan University, School of Pharmacy, Shanghai 201203, China.

29

30 **\*These authors contributed equally to this work.**

31 †**Corresponding to:** Chunhe Wang (wangc@simm.ac.cn), Bo Zhang  
32 (zhangbo@wh.iov.cn) or Qiang Zhou (zhouqiang@westlake.edu.cn).

33 **Abstract**

34 The evolution of coronaviruses, such as SARS-CoV-2, makes broad-spectrum  
35 coronavirus preventional or therapeutical strategies highly sought after. Here we report  
36 a human angiotensin-converting enzyme 2 (ACE2)-targeting monoclonal antibody,  
37 3E8, blocked the S1-subunits and pseudo-typed virus constructs from multiple  
38 coronaviruses including SARS-CoV-2, SARS-CoV-2 mutant variants (SARS-CoV-2-  
39 D614G, B.1.1.7, B.1.351, B.1.617.1 and P.1), SARS-CoV and HCoV-NL63, without  
40 markedly affecting the physiological activities of ACE2 or causing severe toxicity in  
41 ACE2 “knock-in” mice. 3E8 also blocked live SARS-CoV-2 infection *in vitro* and in a  
42 prophylactic mouse model of COVID-19. Cryo-EM and “alanine walk” studies  
43 revealed the key binding residues on ACE2 interacting with the CDR3 domain of 3E8  
44 heavy chain. Although full evaluation of safety in non-human primates is necessary  
45 before clinical development of 3E8, we provided a potentially potent and “broad-  
46 spectrum” management strategy against all coronaviruses that utilize ACE2 as entry  
47 receptors and disclosed an anti-coronavirus epitope on human ACE2.

## 48 **Introduction**

49 In the last 20 years, coronaviruses have caused three major transmissible disease  
50 outbreaks in human, including severe acute respiratory syndrome (SARS) <sup>1</sup>, Middle  
51 East respiratory syndrome (MERS) <sup>2</sup> and coronavirus disease 2019 (COVID-19) <sup>3,4</sup>.

52 One of the challenges to control coronaviruses is that they evolve constantly, even  
53 though slower than HIV and influenza<sup>5</sup>. Analyses of over 28,000 gene sequences of  
54 SARS-CoV-2 spike protein (S-protein) in May 2020 revealed a D614G amino acid  
55 substitution (SARS-CoV-2-D614G) that was rare before March 2020, but increased  
56 greatly in frequency as the pandemic spread worldwide, reaching over 74% of all  
57 published sequences by June 2020 <sup>6</sup> and 81% by May 2021 (GISAID). Evolution of  
58 coronaviruses renders them ability to evade virus-specific medications <sup>7,8</sup>. Recently, the  
59 emergence of multiple mutant variants of SARS-CoV-2, including B.1.1.7 (UK),  
60 B.1.351 (South Africa), P.1 (Brazil) <sup>9</sup> and B.1.617 <sup>10</sup> (India) manifests such challenge.  
61 In fact, a monoclonal antibody against SARS-CoV-2, bamlanivimab, has been revoked  
62 Emergency Use Authorization for expected poor performance against variants currently  
63 popular in the US (FDA news). In theory, broad-spectrum coronavirus therapeutics can  
64 withstand viral mutations and be potentially utilized in future campaigns against  
65 different coronavirus outbreaks.

66 The key to developing broad-spectrum coronavirus therapeutics is to identify  
67 broad-spectrum anti-viral targets. Although RNA polymerase is a broad anti-RNA virus  
68 target, it suffers from low specificity and efficacy <sup>11,12</sup>. By employing a multi-  
69 dimensional approach, Gordon et al. proposed a set of potential “pan” viral target for  
70 coronaviruses, but the druggability of these targets are yet to be evaluated <sup>13</sup>. ACE2  
71 fusion proteins can act as decoy receptors to trap SARS-CoV-2 <sup>14,15</sup>, but the affinity and  
72 developability of these proteins are generally less than antibodies. Recently, Rappazzo  
73 et al. generated a set of monoclonal antibodies that bound to a large panel of  
74 coronaviruses, but their neutralizing abilities have not been tested yet <sup>16</sup>.

75 The infection of SARS-CoV-2 is triggered by binding of their envelope spike  
76 glycoproteins (S-protein) to angiotensin-converting enzyme 2 (ACE2) molecules  
77 expressed on host cells <sup>17,18</sup>. The S-protein consists of two subunits: 1) S1-subunit (also  
78 called S1-protein) at N-terminal, containing the receptor-binding domain (RBD)  
79 responsible for ACE2 binding; 2) S2-subunit at C-terminal responsible for membrane  
80 fusion <sup>18</sup>. The RBD of SARS-CoV-2 has been heavily targeted by antibodies as well as  
81 small molecule approaches <sup>19-23</sup>, but the RBD-targeting approaches are prone to drug  
82 resistance caused by viral evolution and are not broad-spectrum.

83 ACE2 is a type-I transmembrane glycoprotein that plays important roles in  
84 maintaining blood pressure homeostasis in the renin-angiotensin system <sup>24,25</sup>. It is a  
85 shared receptor for multiple coronaviruses, such as SARS-CoV-2, SARS-CoV, HCoV-  
86 NL63<sup>17,26,27</sup>, bat coronavirus RaTG13<sup>28</sup>, pangolin coronavirus GX/P2V/2017 and  
87 GD/1/2019 <sup>29</sup>. SARS-CoV, a close sibling of SARS-CoV-2 in the coronavirus family,  
88 was the culprit that caused SARS outbreak in 2003 <sup>3</sup>, while HCoV-NL63 infects human  
89 much more frequently but causes only cold symptoms with moderate clinical impacts  
90 <sup>30</sup>. Binding of coronavirus to ACE2 not only facilitates viral entry into the host cells,  
91 but also down-regulates ACE2 expression <sup>31,32</sup>.

92 Previous results revealed that the RBD binding site of ACE2 does not overlap with  
93 its catalytic site <sup>33-35</sup>, it is therefore hypothesized that targeting the RBD binding site on  
94 ACE2 with antibodies can block the entry of all ACE2-dependent coronaviruses, while  
95 sparing ACE2's physiological activities. Such antibodies can be theoretically utilized  
96 in managing both current and future coronavirus outbreaks and tolerate viral mutations.  
97 By targeting ACE2, additionally, the antibody could be evaluated in HCoV-NL63  
98 patients even when COVID-19 patients are no longer available for clinical trials.

99 To test the hypothesis, we generated a monoclonal antibody, namely 3E8, to target  
100 the RBD-binding site on ACE2. The therapeutic potentials and safety profiles of 3E8  
101 were investigated and the key binding sites of 3E8 on human ACE2 molecule were  
102 revealed by cryo-EM and mutation studies to aid future drug discovery endeavor.

103

## 104 **Results**

105

### 106 Antibody generation by hybridoma technology

107 BALB/c mice were immunized with Fc-tagged human ACE2 protein and the sera were  
108 screened for binding to ACE2 (supplementary Fig. 1a) and blocking of SARS-CoV-2  
109 S1-subunit and ACE2 interaction (supplementary Fig. 1b). Hybridoma cells were  
110 constructed and the supernatants were screened by the same assays mentioned above.  
111 Antibody 3E8 was screened out from a pool of neutralizing antibodies as the most  
112 efficacious blocker of S1-subunit binding to ACE2. The variable regions of the heavy  
113 ( $V_H$ ) and light ( $V_L$ ) chains were cloned into human IgG4 backbone, transiently  
114 expressed in HEK293F cells and purified (supplementary Fig. 1c). Protein qualities  
115 were examined by reduced and non-reduced gels (supplementary Fig. 1d).

116

### 117 3E8 binds human ACE2 with moderate affinity

118 We measured the binding affinity of 3E8 to His-tagged human ACE2 protein with  
119 ELISA and biolayer interferometry (BLI). The  $EC_{50}$  value was 15.3 nM in ELISA (Fig.  
120 1a) and apparent dissociation constant ( $K_D$ ) was 30.5 nM in BLI using dimeric ACE2  
121 (residues 19-740) as the soluble analyte (Fig. 1b). It also bound to HEK293F cells  
122 ectopically overexpressing human ACE2 and to Vero E6 cells endogenously expressing  
123 human ACE2, as demonstrated by flow cytometry (supplementary Fig. 1e).

124

### 125 3E8 blocks the bindings of S1-subunits or RBD from multiple coronaviruses to ACE2

126 We investigated the abilities of 3E8 to block the ACE2 binding of S1-subunits or RBD  
127 from SARS-CoV-2, SARS-CoV-2-D614G, B.1.1.7, B.1.351, B.1.617.1, P.1, SARS-  
128 CoV and HCoV-NL63. These S1-subunits or RBD can all bind to Fc-tagged human  
129 ACE2 molecules (Fig. 1c-g), and the  $EC_{50}$  values to Fc-tagged recombinant human  
130 ACE2 molecule were 11.8, 2.6, 0.8, 6.9, 51.3, 14.9, 1.1 and 24.2 nM, respectively (Fig.

131 1h). Incubation with 3E8 effectively blocked all S1-subunits or RBD binding to ACE2  
132 (Fig. 2a-e) and the  $IC_{50}$  values were 7.1, 13.8, 10.0, 3.7, 10.5, 9.3, 13.7 and 5.0 nM,  
133 respectively (Fig. 2f). Thus, 3E8 can broadly block the binding of S1-subunits or RBD  
134 from multiple coronaviruses, including the fast-spreading SARS-CoV-2 variants, to  
135 human ACE2 molecules.

136

137 3E8 abolishes the infectivity of multiple pseudo-typed coronaviruses

138 We next constructed pseudo-typed coronaviruses with full-length S-proteins from  
139 SARS-CoV-2, SARS-CoV-2-D614G, B.1.1.7, B.1.351, B.1.617.1, SARS-CoV and  
140 HCoV-NL63 (Fig. 3a-g). All pseudoviruses could infect HEK293F cells that  
141 ectopically express human ACE2, while SARS-CoV-2-D614G showed significantly  
142 enhanced infectivity when compared to the original SARS-CoV-2 (supplementary Fig.  
143 2). Incubation with 3E8 fully abolished the infectivity of all pseudoviruses, with  $IC_{50}$   
144 values at 0.1, 0.1, 0.07, 0.3, 0.08, 0.2 and 1.1 nM, respectively (Fig. 3h). In comparison,  
145 B38, a SARS-CoV-2 RBD-targeting antibody currently under clinical development <sup>36</sup>,  
146 could only suppress the infectivity of SARS-CoV-2, SARS-CoV-2-D614G, B.1.1.7 and  
147 B.1.617.1, but not B.1.351, SARS-CoV or HCoV-NL63. The suppression by 3E8 was  
148 not only broader, but also remarkably more efficacious and potent, as the  $IC_{50}$  values  
149 of 3E8 was hundreds of folds improved when compared to that of B38 (Fig. 3h). ACE2-  
150 Fc fusion protein, a virus RBD-targeting molecule consisting the extracellular domain  
151 of human ACE2 and the Fc region of human IgG1, showed broad but moderate blocking  
152 ability on pseudoviruses. Our investigation indicated that 3E8 was potentially a  
153 powerful and broad-spectrum blocker on coronaviruses that are dependent on ACE2.

154

155 3E8 inhibits live SARS-CoV-2 infection of Vero E6 cells

156 Live virus study in a BSL-3 laboratory setting showed that incubation with 3E8  
157 inhibited in a concentration-dependent manner the replication of SARS-CoV-2 in Vero  
158 E6 cells. The RBD-targeting B38 antibody, also inhibited SARS-CoV-2 replication, but

159 was 60-fold less potent than 3E8, as suggested by the difference between their  $IC_{50}$   
160 values (2.3 vs. 0.04 nM), even though both completely abolished SARS-CoV-2  
161 replication at high concentrations (Fig. 4a).

162

163 3E8 blocks SARS-CoV-2 in a prophylaxis mouse model of COVID-19

164 More importantly, the neutralizing ability of 3E8 was validated in a prophylaxis mouse  
165 model of COVID-19. This model was generated by exogenous delivery of hACE2 with  
166 Venezuelan equine encephalitis replicon particles, VEEV-VRP-hACE2<sup>37</sup>. It was a non-  
167 lethal infection model that was suitable for measuring viral RNA loads and histological  
168 pathology of lungs. After hACE2 was intranasally delivered by VEEV, the antibodies  
169 were administered intraperitoneally at 10 mg/kg, and mice were challenged intranasally  
170 with  $10^5$  PFU of live SARS-CoV-2 12 hours later. The viral RNA loads and tissue  
171 damages in lungs were examined 3 days post infection. Consistent with our *in vitro*  
172 results, application of 3E8 protected lungs from virus infection, as indicated by  
173 approximately 40-fold reduction in lung viral loads (Fig. 4b) and ameliorated tissue  
174 damages (Fig. 4c). In comparison, the viral loads in B38-treated mice were only about  
175 5 times lower than that of control mice. Thus, application of 3E8 achieved significantly  
176 greater anti-viral effects than that of B38 in the COVID-19 mouse model we employed.

177

178 3E8 has no effects on ACE2's catalytic activities or causes toxicity in "knock-in" mice  
179 Since ACE2 plays important roles in maintaining blood pressure homeostasis in the  
180 renin-angiotensin system, we evaluated the safety risks of 3E8 application both *in vitro*  
181 and *in vivo*. Our studies with both recombinant ACE2 protein and Vero E6 cells  
182 suggested that 3E8 had no effects on ACE2's catalytic activities even at 666.7 nM (Fig.  
183 5a, b). Furthermore, incubation with 3E8 did not trigger a clear trend of ACE2  
184 degradation in Vero E6 cells, as indicated by Western blot (Fig. 5c). Although 3E8  
185 caused time-dependent internalization of ACE2, the levels of membrane-expressed  
186 ACE2 were stabilized after 24 h of incubation (Fig. 5d). In limited number of human



187 ACE2 “knock-in” mice, which express human instead of mouse ACE2, injection of  
188 3E8 did not induce noticeable changes in body weights or blood chemistry profiles  
189 (supplementary Fig. 3). In addition, there were no obvious differences in shape, size or  
190 pathological staining of major organs, including hearts, livers, kidneys, spleens and  
191 lungs of treated mice (supplementary Fig. 3).

192

193 3E8 binding epitope on ACE2 is determined by cryo-EM and “alanine walk” studies  
194 To characterize the epitope recognized by 3E8 on ACE2, we solved the cryo-EM  
195 structure of the ACE2-B<sup>0</sup>AT1 complex bound with 3E8 at an overall resolution of 3.2  
196 Å (Fig. 6). Each ACE2 molecule in the complex is bound by a 3E8 molecule that  
197 extends from the complex like a wing (Fig. 6a). The heavy chain of 3E8 binds to the  
198 peptidase domain of ACE2 mainly through polar interactions between the  
199 complementarity-determining region (CDR) 2 and 3 of 3E8 and the N-terminal  $\alpha$ 1 helix  
200 of ACE2 (Fig. 6b). The loop between  $\alpha$ 2 and  $\alpha$ 3 of ACE2, referred to as Loop2-3, also  
201 contribute limited interactions with 3E8. The resolution at the interface was improved  
202 to 3.4 Å by applying focused refinement, supporting detailed analysis on the  
203 interactions between ACE2 and 3E8. The interface can be divided into two clusters. At  
204 cluster 1, the side chains of Asp103 and Arg104 of 3E8 are hydrogen (H) bonded with  
205 the main chain of Phe28 in  $\alpha$ 1 helix of ACE2 and the side chain of Tyr83 in Loop2-3  
206 of ACE2, respectively (Fig. 6c). Meanwhile, the main chain atoms of Asp103 and  
207 Asp104 of 3E8 form H-bonds with the side chain of Gln24 of ACE2. At cluster 2, Tyr54  
208 and Tyr102 of 3E8 interact with Lys31 of ACE2 through cation- $\pi$  interactions, whereas  
209 Asn55 and Lys59 of 3E8 interact with His34 of ACE2 and Glu23 and Gln18 of ACE2,  
210 respectively, by forming H-bonds between side chains of these residues (Fig. 6d).  
211 Additionally, we performed “alanine walk” studies and identified Gln24 as the most  
212 critical amino acid residue that interact with the CDR3 of 3E8 heavy chain (Fig. 6e),  
213 consistent with the general concept that the CDR3 of heavy chain contributes the most  
214 to antigen recognition and binding. Although His34 was indicated by EM study to

215 interact with the CDR2 of the heavy chain, mutation of it to alanine (Fig. 6e) or other  
216 amino acid residues (data not shown) failed to alter the binding of 3E8 to ACE2.  
217 Structural alignment of the 3E8/ACE2-B<sup>0</sup>AT1 complex with the previously reported  
218 RBD/ACE2-B<sup>0</sup>AT1 complex reveals clash between 3E8 and RBD of SARS-CoV-2 at  
219 the binding interface with ACE2 (Fig. 6f), providing an explanation for the results of  
220 competition assays. The binding site of 3E8, SARS-CoV-2, SARS-CoV and HCoV-  
221 NL63 on ACE2 were summarized<sup>38-40</sup> (Fig. 6g). Evolutionary tree of 3E8 binding site  
222 on ACE2 with different species was also provided (Fig. 6h), and phylogenetic  
223 diversities at position 23, 24, 31 and 34 were identified.

224

## 225 **Discussion**

226 To block the entry of coronavirus, either virus- or ACE2-directed strategies can be  
227 taken. Targeting viruses directly is theoretically safer but vulnerable to viral evolution.  
228 By targeting ACE2 with an RBD-blocking antibody, we achieved broader and more  
229 effective suppression against ACE2-dependent coronaviruses without causing severe  
230 side effects. Furthermore, we revealed a broad-spectrum anti-coronavirus epitope on  
231 ACE2.

232 The mechanism by which 3E8 is more potent and efficacious than RBD-targeting  
233 antibody B38 is not yet fully understood. Limited by the sample size and evaluation  
234 using only a prophylactic regimen in a non-lethal animal model, it is premature to  
235 conclude that targeting ACE2 is superior to targeting viral RBD in potency or efficacy.  
236 B38 is one of the early anti-SARS-CoV-2 antibodies isolated from COVID-19 patients  
237 and due to the urgent nature, it was not well engineered with respect to affinity and  
238 developability. More head-to-head studies with more ACE2- and RBD-targeting  
239 molecules are necessary before drawing any conclusion.

240 ACE2-Fc (or called ACE2-Ig) fusion protein molecules may act as a “decoy” to  
241 interfere coronaviruses from binding to endogenous ACE2 molecules (Fig. 2 and Fig.  
242 3). Although ACE2-Fc molecules are broad-spectrum in theory, their binding affinity

243 (to RBDs), specificity and developability are usually lower than antibodies. ACE2-Fc  
244 was included in our studies as a control and moderate efficacy was observed *in vitro*.  
245 Thus, ACE2-neutralizing antibody appears to be a more favorable approach than  
246 ACE2-Fc fusion protein.

247 “Cocktails” or combination therapies have been currently explored in treating  
248 COVID-19<sup>19</sup>. A combination of 3E8 with antibodies recognizing different epitopes  
249 (e.g., RBD, NTD and/or glycan) on the viral surface seems a viable option and could  
250 be explored in clinic for better efficacy.

251 It is not surprising that no severe side effects or toxicity of 3E8 were observed *in*  
252 *vitro* or in human ACE2 “knock-in” mice. *In vitro*, 3E8 did not affect the catalytic  
253 activities of ACE2 or trigger significant ACE2 down-regulation. Even though ACE2  
254 internalization was overserved, the levels of membrane ACE2 expression were  
255 stabilized after 24 h. It is possible that the ACE2 molecules remaining on the membrane  
256 are sufficient to maintain the physiological functions of ACE2-expressing cells.  
257 Previous studies showed that ACE2 “knockout” mice were viable and healthy in  
258 general, even though the contractile dysfunction was found<sup>41</sup>, indicating that ACE2 is  
259 not crucial to the survival of animals. Due to limited animal availability, the conclusion  
260 from human ACE2 “knock-in” mice should not be overinterpreted. We plan to repeat  
261 this study when more animals are commercially available. Moreover, key signs of  
262 cardiovascular health, such as pulse pressure and heartbeat rate, cannot be conveniently  
263 measured in mice. Thus, the side effects and toxicities of 3E8 should be carefully  
264 evaluated in non-human primates before moving to the clinic.

265 A few broad-spectrum anti-coronavirus antibody or virus decoy receptor strategies  
266 have been disclosed<sup>14,15,16</sup>. Among them, Rappazzo et al. reported an RBD-targeting  
267 antibody with exceptional breadth against distantly related SARS viruses<sup>16</sup>, even  
268 though some highly transmissible variants weren't explicitly tested since they were not  
269 well described in January 2021 when Rappazzo's manuscript was accepted for  
270 publication. The antibody performed well in a phase 1 trial and is currently in a phase

271 2/3 trial, exemplifying the power of broad-spectrum antibody therapies. Nevertheless,  
272 current coronavirus-targeting antibodies focus mainly on highly conserved regions of  
273 RBD, such as S309<sup>20</sup>, 47D11<sup>21</sup>, D405, G502, G504 and Y50<sup>16</sup>. The epitope of 3E8  
274 binding on ACE2 is only partially overlapping with that of RBD domain, but blocked  
275 virus infections with remarkable efficiency, demonstrating the extraordinary power of  
276 ACE2 targeting strategy. Previously, neutralizing antibodies (4A8)<sup>42</sup> and 89C8-ACE2  
277<sup>43</sup> were isolated from convalescent COVID-19 patients with binding on the N-terminal  
278 domain (NTD) of the SARS-CoV-2 S-protein, but not the RBD. Our results highlighted  
279 again the importance of epitope outside or on the verge of RBD/ACE2 interface, and  
280 would facilitate future endeavor searching for broad-spectrum anti-coronavirus  
281 approaches.

282 Overall, we presented evidence that 3E8 was a promising therapeutic candidate  
283 for coronavirus pandemic and believe that it represents a significant conceptual advance  
284 in fighting COVID-19, which keeps evolving, and may open the door for more ACE2-  
285 targeting drug discovery and development.

286

## 287 **Materials and methods**

288 Spike mutations on SARS-CoV-2 variants:

289 B.1.1.7: H69 deletion, V70 deletion, Y144deletion, N501Y, A570D, D614G, P681H,  
290 T716I, S982A, D1118H;

291 B.1.351: D80A, D215G, A242-244 deletion, K417N, E484K, N501Y, D614G, A701V;

292 B.1.617.1: T95I, G142D, E154K, L452R, E484Q, D614G, P681R, Q1071H;

293 P.1: L18F, T20N, P26S, D138Y, R190S, K417T, E484K, N501Y, D614G, H655Y,  
294 T1027I, V1176F.

295 Biolayer interferometry (BLI)

296 Binding affinities were measured by BLI using ForteBio Octet Red 96. For affinity  
297 measurement, 10 µg/ml of 3E8 was captured by protein A biosensor and incubated with  
298 different concentrations of hACE2-his protein. The baseline was established by PBS

299 with 0.05% tween-20 for 60 s. The association was set at 240 s and the dissociation  
300 periods was set at 300 s. The mean  $K_{on}$ ,  $K_{off}$  and apparent  $K_D$  values of binding  
301 affinities were calculated from all binding curves based on their global fit to 1:1.

302

### 303 Neutralization ELISA

304 S1-proteins (2  $\mu\text{g/ml}$ ) were coated onto plates at 4°C overnight. Serial dilutions of 3E8  
305 or isotype were pre-incubated with 5  $\mu\text{g/ml}$  of ACE2-Fc for 30 min at room temperature.  
306 Then, the mixture was added into the coated plate wells and incubated for 1h. The  
307 bound ACE2-Fc was detected by HRP-conjugated goat anti-human IgG and developing  
308 substrate.

309

### 310 Pseudo-typed virus neutralization assay

311 Pseudo-typed SARS-CoV-2-D614G, SARS-CoV-2, SARS-CoV, HCoV-NL63,  
312 B.1.1.7, B.1.351 and B.1.617.1 were constructed by co-transfection of two plasmids,  
313 one expressing Env-defective HIV-1 with luciferase reporter (pNL4-3.luc.RE)<sup>44</sup> and  
314 the other expressing the full-length S-protein of SARS-CoV-2-D614G, SARS-CoV-2,  
315 SARS-CoV, HCoV-NL63, B.1.1.7, B.1.351, or B.1.617.1 into HEK293T cells. The  
316 supernatant containing virus particles was harvested 48 h post-transfection followed by  
317 0.45  $\mu\text{m}$  filtration. HEK293F/ACE2/EGFP cells were pre-seeded with  $1.2 \times 10^4$  cells per  
318 well in a 96-well plate. The confluent cells were incubated with 50  $\mu\text{l}$  of serially-diluted  
319 antibodies or ACE2-Fc for 1h at 37°C followed by addition of various pseudoviruses  
320 of the same volume. 100  $\mu\text{l}$  of DMEM with 10% FBS was added as negative control.  
321 100  $\mu\text{l}$  of pseudovirus and DMEM mixed at ratio 1:1 was used as positive control. After  
322 24 h, medium was changed and the cells were incubated for another 48 h. The relative  
323 light units (RLUs) of luminescence were measured by Firefly Luciferase Reporter  
324 Assay Kit (Meilunbio). Neutralization (%) =  $[1 - (\text{RLU}_{\text{samples}} - \text{RLU}_{\text{negative control}}) /$   
325  $(\text{RLU}_{\text{positive control}} - \text{RLU}_{\text{negative control}})] \times 100\%$ . The  $IC_{50}$  values were calculated by non-  
326 linear.

327

328 Live SARS-CoV-2 suppression *in vitro*

329 Vero E6 (ATCC® CRL-1586™) cells were trypsinized and pre-seeded into 24-well  
330 plates in duplicate with  $1 \times 10^5$  cells/well in DMEM containing 10% FBS (100 U/mL  
331 of penicillin and 100 µg/ml of streptomycin) at 37°C with 5% CO<sub>2</sub> one day before.  
332 After confluent, antibodies of 3-fold serially diluted were added, and Vero E6 cells  
333 were infected with live SARS-CoV-2 (IVCAS 6.7512) virus at a multiplicity of  
334 infection (MOI) of 0.01. After 24h incubation, the culture supernatants were collected  
335 and viral RNA was quantified via qRT-PCR using Luna® Universal Probe One-Step  
336 RT-PCR Kit (E3006) on CFX96 Touch™ Real-Time PCR Detection System (Bio Rad).  
337 Primers used were as follows: RBD-qF1: 5'-caatggttaacaggcacagg-3', RBD-qR1: 5'-  
338 ctcaagtgtctgtggatcacg-3', Probe: acagcatcagtagtgcagcaatgtctc. IC<sub>50</sub> was fitted and  
339 calculated by GraphPad Prism 8. Data represents as mean ± SD of two replicates from  
340 one representative experiment, and the experiment was repeated for 3 times.

341

342 COVID-19 mouse model and disease suppression

343 BALB/c mice were purchased from Wuhan Institute of Biological Products Co. Ltd.  
344 and cared in accordance with the recommendations of National Institutes of Health  
345 Guidelines for the Care and Use of Experimental Animals. All the animal studies were  
346 conducted in biosafety level 3 (BSL-3) facility at Wuhan Institute of Virology under a  
347 protocol approved by the Laboratory Animal Ethics Committee of Wuhan Institute of  
348 Virology, Chinese Academy of Sciences (Permit number: WIVA26201701).

349 A mouse model recently established by VEEV-VRP delivery of ACE2 for SARS-CoV-  
350 2 infection<sup>37</sup> was used to evaluate the efficacy of 3E8 *in vivo*. Four groups of six- to  
351 eight-week-old female BALB/c mice (n=5 per group) were first intranasally infected  
352 with 10<sup>6</sup> FFU VRP-ACE2 per mouse in a total volume of 80 µl after anesthetization  
353 with Avertin (250 mg/kg). The mice from different groups were treated with 3E8, B38  
354 or isotype at a dose of 10 mg/kg 12 h later via intraperitoneal injection. After another

355 12 h, all mice were intranasally infected with  $10^5$  PFU SARS-CoV-2 in a total volume  
356 of 50  $\mu$ l. 3 days post infection of SARS-CoV-2, the lungs of mice were collected for  
357 viral RNA quantification and histological analysis. For RNA quantification, some lungs  
358 were homogenized in DMEM medium, and viral RNA was extracted using QIAamp  
359 viral RNA mini kit (52906, Qiagen) following the manufacturer's protocol. qRT-PCR  
360 assay was performed using Luna® Universal Probe One-Step RT-PCR Kit (E3006).  
361 Primers and probe used were: RBD-qF1: 5'-caatggtttaacaggcacagg-3', RBD-qR1: 5'-  
362 ctcaagtgtctgtggatcacg -3', Probe: acagcatcagtagtgcagcaatgtctc. For histological  
363 analysis, lung samples from mice were fixed with 4% paraformaldehyde, embedded in  
364 paraffin, sagittally sectioned at 4  $\mu$ m thickness on a microtome, and mounted on APS-  
365 coated slides for H&E stain.

366

#### 367 ACE2 enzymatic activity assay

368 The catalytic activities of recombinant and endogenous ACE2 was detected according  
369 to a published protocol using fluorescent substrate, Mca-APK-Dnp (AnaSpec)<sup>45</sup>. To  
370 determine the impact on enzyme activity, serial diluted antibodies were pre-incubated  
371 with 2.0  $\mu$ g/ml of recombinant human ACE2 at room temperature for 1 h on a shaker.  
372 After incubation, the neutralization solution was 1:5 diluted with activity buffer<sup>45</sup> and  
373 then mixed with 50  $\mu$ l/well of 200 mM substrate. The mixture was incubated at 37 °C  
374 for 20 min before the RFU of fluorescent signals were read on an Envision microplate  
375 reader (Perkin Elmer, Waltham, MA) with excitation wavelength set at 320 nm and  
376 emission wavelength set at 400 nm. To measure endogenous ACE2 enzymatic activity,  
377 Vero E6 cells were seeded in a 96-well plate at  $1 \times 10^5$  cells/well and cultured overnight.  
378 The cells were then incubated with 10  $\mu$ g/ml of 3E8, AF933(R&D Systems,  
379 Minneapolis, MN) and isotype for 60 min at 37°C before mixed with 50  $\mu$ l/well of  
380 activity buffer and 50  $\mu$ l/well of substrate. The cells were incubated for 20 min at 37°C  
381 before transferred to black 96-well plate for fluorescence reading.

382

383 **Data availability statements**

384 All data supporting the findings of this study are available from the corresponding  
385 author on reasonable request.

386

387 **Acknowledgements**

388 We thank Dr. Hong Qiu (Shanghai Institute of Materia Medica) for providing the  
389 eukaryotic codon-optimized SARS-CoV-2 S-protein gene, James C. Wang (Shanghai  
390 American School) for assistance in ELISA and manuscript editing, Dr. Lu Lu (Fudan  
391 University) for providing pNL4-3.luc.RE, the cryo-EM facility and supercomputer  
392 center of Westlake University for providing cryo-EM and computing support.

393 This work was supported by the China National Major Scientific and  
394 Technological Special Project for “Significant New Drugs Innovation and  
395 Development” (2019ZX09732002-006), the Strategic Priority Research Program of the  
396 Chinese Academy of Sciences (CAS) (XDA12020223 and XDA12020330), the  
397 National Natural Science Foundation of China (81872785, 81673347, 31971123,  
398 32022037, 81920108015 and 31930059), Shanghai Municipal Commission of Science  
399 and Technology of China (17431904400 and 19YF1457400), Institutes for Drug  
400 Discovery and Development, Chinese Academy of Sciences (CASIMM0120202008,  
401 CASIMM0120202007), the National Key R&D Program (2020YFA0509303), Major  
402 Scientific and Technological Special Project of Zhongshan City (191022172638719,  
403 210205143867019), the Key R&D Program of Zhejiang Province (2020C04001), the  
404 SARS-CoV-2 emergency project of the Science and Technology Department of  
405 Zhejiang Province (2020C03129), the Leading Innovative and Entrepreneur Team  
406 Introduction Program of Hangzhou, Westlake Education Foundation and Tencent  
407 Foundation.

408

409 **Conflict of interests**

410 Yili Chen, Ganjun Chen and Chunhe Wang are employed by Dartsbio Pharmaceuticals.



411

## 412 **Contributions**

413 Yuning Chen, Guifeng Wang, Jianxia Ou, Wendi Chu, Zhijuan Liang, Yongmei Wang  
414 and Qi Wang in Shanghai institute of Materia Medica constructed the hybridoma cells,  
415 screened the antibody and assayed the binding and neutralizing activity against ACE2  
416 and pseudo-typed viruses; Yanan Zhang, Zherui Zhang and Bo Zhang in Wuhan  
417 Institute of Virology conducted the anti-live virus activities (both *in vitro* and in mouse  
418 models) and drafted the respective section of the manuscript; Renhong Yan, Yuanyuan  
419 Zhang and Qiang Zhou in Westlake University conducted the cryo-EM experiments  
420 and drafted the respective section of the manuscript; Yili Chen and Ganjun Chen in  
421 Dartsbio Pharmaceuticals conducted some of the molecular and cellular experiments;  
422 Yaning Li in Tsinghua University conducted the 3E8-ACE2 structural analysis  
423 experiments. Chunhe Wang designed the experiments and drafted the manuscript.

424

## 425 **References**

- 426 1 Drosten, C. *et al.* Identification of a novel coronavirus in patients with severe  
427 acute respiratory syndrome. *N. Engl. J. Med.* **348**, 1967-1976 (2003).
- 428 2 Zaki, A. M., van Boheemen, S., Bestebroer, T. M., Osterhaus, A. D. & Fouchier,  
429 R. A. Isolation of a novel coronavirus from a man with pneumonia in Saudi  
430 Arabia. *N. Engl. J. Med.* **367**, 1814-1820 (2012).
- 431 3 Wu, F. *et al.* A new coronavirus associated with human respiratory disease in  
432 China. *Nature* **579**, 265-269 (2020).
- 433 4 Zhou, P. *et al.* A pneumonia outbreak associated with a new coronavirus of  
434 probable bat origin. *Nature* **579**, 270-273 (2020).
- 435 5 Nguyen, T. T. *et al.* Genomic mutations and changes in protein secondary  
436 structure and solvent accessibility of SARS-CoV-2 (COVID-19 virus). *Sci. Rep.*  
437 **11**, 3487 (2021).
- 438 6 Plante, J. A. *et al.* Spike mutation D614G alters SARS-CoV-2 fitness. *Nature*  
439 **592**, 116-121 (2020).
- 440 7 Watanabe, Y., Allen, J. D., Wrapp, D., McLellan, J. S. & Crispin, M. Site-  
441 specific glycan analysis of the SARS-CoV-2 spike. *Science* **369**, 330-333  
442 (2021).
- 443 8 Li, Q. *et al.* The Impact of Mutations in SARS-CoV-2 Spike on Viral Infectivity  
444 and Antigenicity. *Cell* **182**, 1284-1294.e9 (2020).

- 445 9 Shen, X. *et al.* SARS-CoV-2 variant B.1.1.7 is susceptible to neutralizing  
446 antibodies elicited by ancestral spike vaccines. *Cell Host Microbe* **29**, 529-  
447 539.e3 (2021).
- 448 10 Yadav, P. D. *et al.* Neutralization of variant under investigation B.1.617 with  
449 sera of BBV152 vaccinees. *Clin. Infect. Dis.* <http://dx.doi:10.1093/cid/ciab411>  
450 (2021).
- 451 11 Grein, J. *et al.* Compassionate Use of Remdesivir for Patients with Severe  
452 Covid-19. *N. Engl. J. Med.* **382**, 2327-2336 (2020).
- 453 12 Wang, Y. *et al.* Remdesivir in adults with severe COVID-19: a randomised,  
454 double-blind, placebo-controlled, multicentre trial. *Lancet* **395**, 1569-1578  
455 (2020).
- 456 13 Gordon, D. E. *et al.* Comparative host-coronavirus protein interaction networks  
457 reveal pan-viral disease mechanisms. *Science* **370**, eabe9403 (2020).
- 458 14 Chan, K. K., Tan, T. J. C., Narayanan, K. K. & Procko, E. An engineered decoy  
459 receptor for SARS-CoV-2 broadly binds protein S sequence variants. *Sci. Adv.*  
460 **17**, eabf1738 (2021).
- 461 15 Sims, J. J. *et al.* Intranasal gene therapy to prevent infection by SARS-CoV-2  
462 variants. *PLoS Pathog.* **17**, e1009544 (2021).
- 463 16 Rappazzo, C. G. *et al.* Broad and potent activity against SARS-like viruses by  
464 an engineered human monoclonal antibody. *Science* **371**, 823-829 (2021).
- 465 17 Hoffmann, M. *et al.* SARS-CoV-2 Cell Entry Depends on ACE2 and TMPRSS2  
466 and Is Blocked by a Clinically Proven Protease Inhibitor. *Cell* **181**, 271-280.e8  
467 (2020).
- 468 18 Walls, A. C. *et al.* Structure, Function, and Antigenicity of the SARS-CoV-2  
469 Spike Glycoprotein. *Cell* **181**, 281-292.e6 (2020).
- 470 19 Baum, A. *et al.* Antibody cocktail to SARS-CoV-2 spike protein prevents rapid  
471 mutational escape seen with individual antibodies. *Science* **369**, 1014-1018  
472 (2020).
- 473 20 Pinto, D., Park, Y. J., Beltramello, M., Walls, A. C. & Tortorici, M. A. Cross-  
474 neutralization of SARS-CoV-2 by a human monoclonal SARS-CoV antibody.  
475 *Nature* **583**, 290-295 (2020).
- 476 21 Wang, C. *et al.* A human monoclonal antibody blocking SARS-CoV-2 infection.  
477 *Nat. Commun.* **11**, 2251 (2020).
- 478 22 Chi, X. *et al.* A neutralizing human antibody binds to the N-terminal domain of  
479 the Spike protein of SARS-CoV-2. *Science* **369**, 650-655 (2020).
- 480 23 Wu, Y. *et al.* A noncompeting pair of human neutralizing antibodies block  
481 COVID-19 virus binding to its receptor ACE2. *Science* **368**, 1274-1278 (2020).
- 482 24 Santos, R. A., Frézard, F. & Ferreira, A. J. Angiotensin-(1-7): blood, heart, and  
483 blood vessels. *Curr. Med. Chem. Cardiovasc. Hematol. Agents* **3**, 383-391  
484 (2005).
- 485 25 Ferrario, C. M. Angiotensin-converting enzyme 2 and angiotensin-(1-7): an  
486 evolving story in cardiovascular regulation. *Hypertension* **47**, 515-521 (2006).

- 487 26 Li, W. *et al.* Angiotensin-converting enzyme 2 is a functional receptor for the  
488 SARS coronavirus. *Nature* **426**, 450-454 (2003).
- 489 27 Hofmann, H. *et al.* Human coronavirus NL63 employs the severe acute  
490 respiratory syndrome coronavirus receptor for cellular entry. *Proc. Natl. Acad.*  
491 *Sci. U S A* **102**, 7988-7993 (2005).
- 492 28 Li, Y. *et al.* SARS-CoV-2 and Three Related Coronaviruses Utilize Multiple  
493 ACE2 Orthologs and Are Potently Blocked by an Improved ACE2-Ig. *J. Virol.*  
494 **94**, e01283-20 (2020).
- 495 29 Niu, S. *et al.* Molecular basis of cross-species ACE2 interactions with SARS-  
496 CoV-2-like viruses of pangolin origin. *EMBO J.*  
497 <http://dx.doi.org/10.15252/embj.2021107786> (2021).
- 498 30 van der Hoek, L. *et al.* Identification of a new human coronavirus. *Nat. Med.*  
499 **10**, 368-373 (2004).
- 500 31 Oudit, G. Y. *et al.* SARS-coronavirus modulation of myocardial ACE2  
501 expression and inflammation in patients with SARS. *Eur. J. Clin. Invest.* **39**,  
502 618-625 (2009).
- 503 32 Glowacka, I. *et al.* Differential downregulation of ACE2 by the spike proteins  
504 of severe acute respiratory syndrome coronavirus and human coronavirus NL63.  
505 *J. Virol.* **84**, 1198-1205 (2010).
- 506 33 Moore, M. J. *et al.* Retroviruses pseudotyped with the severe acute respiratory  
507 syndrome coronavirus spike protein efficiently infect cells expressing  
508 angiotensin-converting enzyme 2. *J. Virol.* **78**, 10628-10635 (2004).
- 509 34 Kuba, K. *et al.* A crucial role of angiotensin converting enzyme 2 (ACE2) in  
510 SARS coronavirus-induced lung injury. *Nat. Med.* **11**, 875-879 (2005).
- 511 35 Towler, P. *et al.* ACE2 X-ray structures reveal a large hinge-bending motion  
512 important for inhibitor binding and catalysis. *J. Biol. Chem.* **279**, 17996-18007  
513 (2004).
- 514 36 Wu, Y. & Wang, F. A noncompeting pair of human neutralizing antibodies  
515 block COVID-19 virus binding to its receptor ACE2. *Science* **368**, 1274-1278  
516 (2020).
- 517 37 Zhang, Y.-N. *et al.* A mouse model for SARS-CoV-2 infection by exogenous  
518 delivery of hACE2 using alphavirus replicon particles. *Cell Res.* **30**, 1046-1048  
519 (2020).
- 520 38 Yan, R. *et al.* Structural basis for the recognition of SARS-CoV-2 by full-length  
521 human ACE2. *Science* **367**, 1444-1448 (2020).
- 522 39 Li, F., Li, W., Farzan, M. & Harrison, S. C. Structure of SARS coronavirus  
523 spike receptor-binding domain complexed with receptor. *Science* **309**, 1864-  
524 1868 (2005).
- 525 40 Wu, K., Li, W., Peng, G. & Li, F. Crystal structure of NL63 respiratory  
526 coronavirus receptor-binding domain complexed with its human receptor. *Proc.*  
527 *Natl. Acad. Sci. U S A* **106**, 19970-19974 (2009).

- 528 41 Crackower, M. A. *et al.* Angiotensin-converting enzyme 2 is an essential  
529 regulator of heart function. *Nature* **417**, 822-828 (2002).
- 530 42 Chi, X. & Yan, R. A neutralizing human antibody binds to the N-terminal  
531 domain of the Spike protein of SARS-CoV-2. *Science* **369**, 650-655 (2020).
- 532 43 Miao, X. *et al.* A novel biparatopic hybrid antibody-ACE2 fusion that blocks  
533 SARS-CoV-2 infection: implications for therapy. *mAbs* **12**, 1804241 (2020).
- 534 44 Xia, S. *et al.* Inhibition of SARS-CoV-2 (previously 2019-nCoV) infection by  
535 a highly potent pan-coronavirus fusion inhibitor targeting its spike protein that  
536 harbors a high capacity to mediate membrane fusion. *Cell Res.* **30**, 343-355  
537 (2020).
- 538 45 Liao, K., Sikkema, D., Wang, C. & Lee, T. N. Development of an enzymatic  
539 assay for the detection of neutralizing antibodies against therapeutic  
540 angiotensin-converting enzyme 2 (ACE2). *J. Immunol. Methods* **389**, 52-60  
541 (2013).
- 542

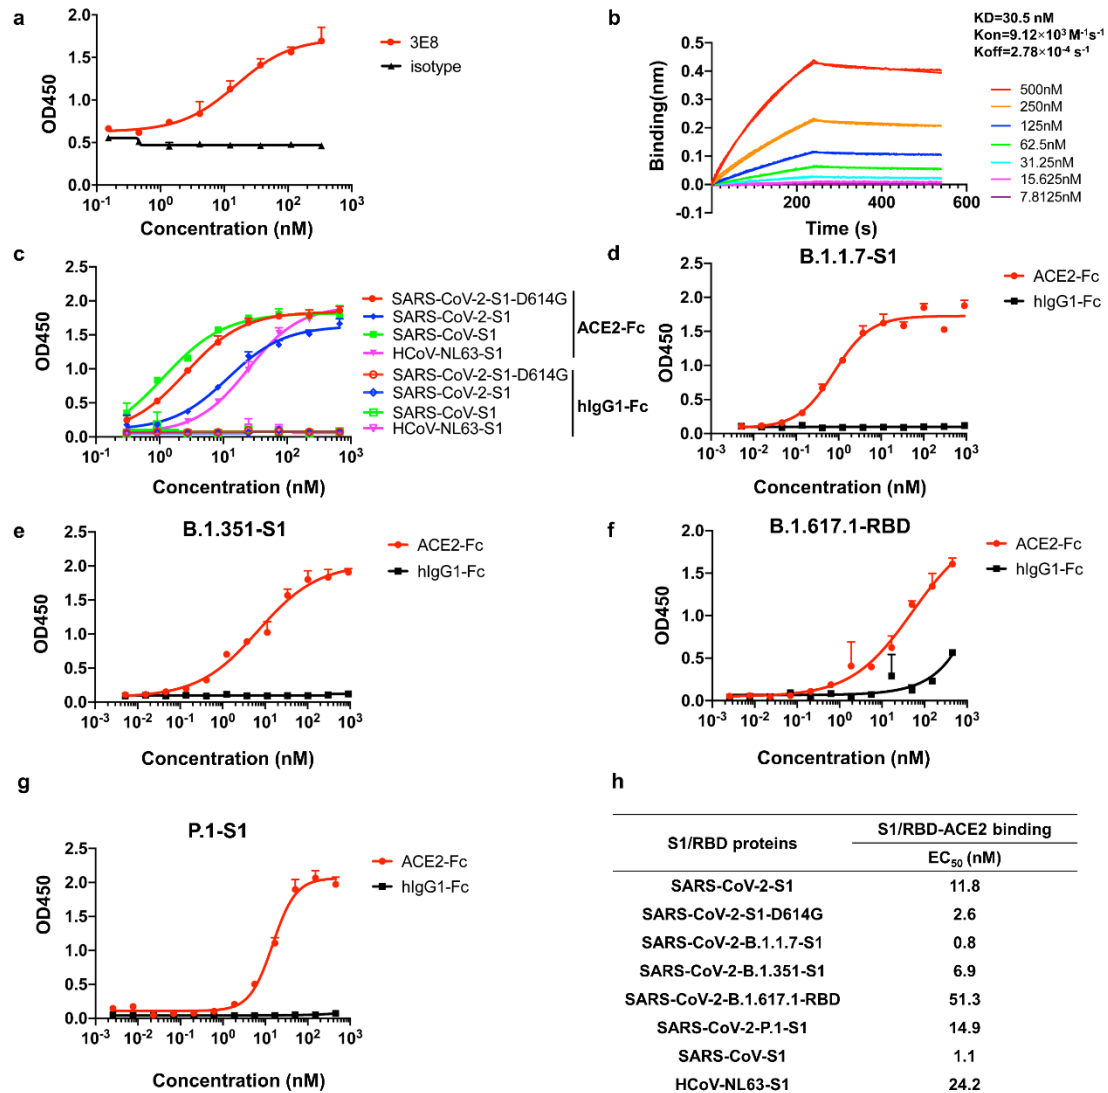

543

544 **Fig. 1.** Monoclonal antibody 3E8 and recombinant S1-subunits or RBD from different  
 545 coronaviruses (and SARS-CoV-2 mutant variants) bound to recombinant human ACE2  
 546 protein. **a** Binding of 3E8 to His-tagged recombinant human ACE2 protein as measured  
 547 by ELISA. **b** Binding of 3E8 to His-tagged human ACE2 as measured by BLI. **c-g**  
 548 Bindings of recombinant S1-subunits or RBD (in **f** only) from multiple coronaviruses  
 549 and SARS-CoV-2 mutated variants to Fc-tagged recombinant human ACE2 protein as  
 550 measured by ELISA. **h** The  $EC_{50}$  values of recombinant S1-subunit bindings to human  
 551 ACE2.

552

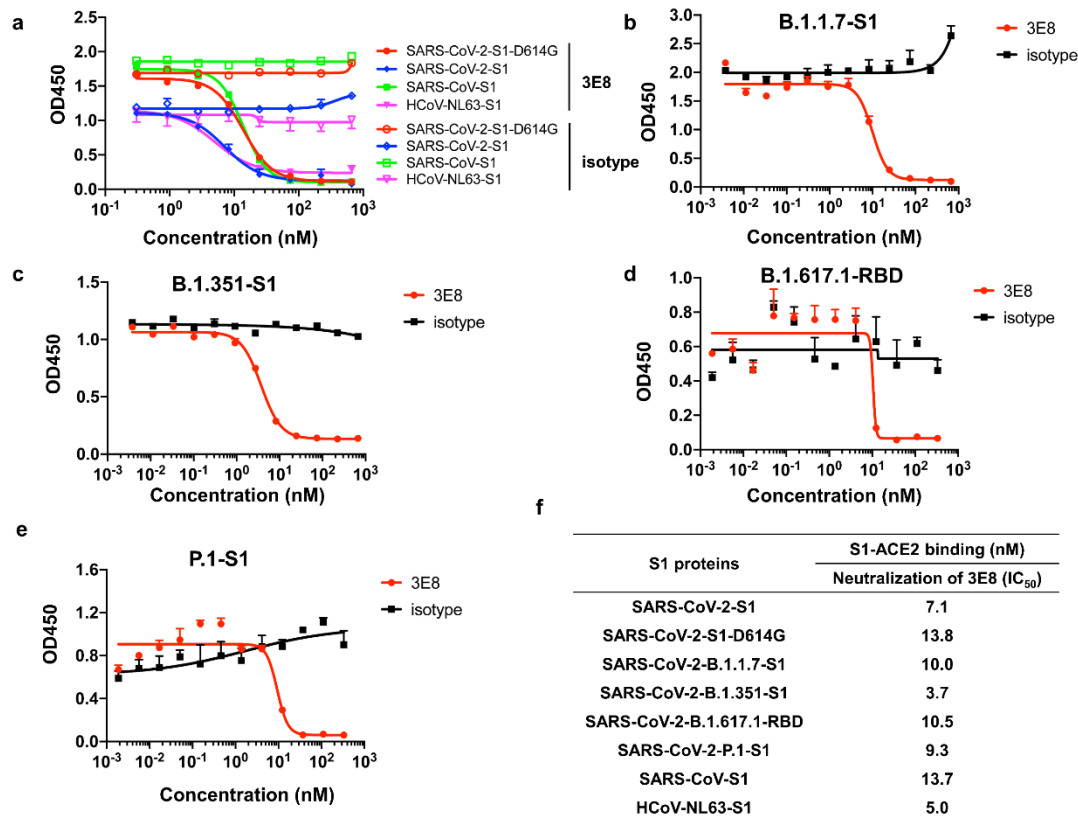

553 **Fig. 2.** 3E8 blocked the bindings of recombinant S1 or RBD from multiple  
 554 coronaviruses and SARS-CoV-2 variants to Fc-tagged recombinant human ACE2  
 555 protein. **a-e** Bindings of His-tagged S1 or RBD (in **d** only) from different coronaviruses  
 556 including SARS-CoV, HCoV-NL63, SARS-CoV-2 and emerging epidemic SARS-  
 557 CoV-2 variants to recombinant human ACE2 protein were blocked by 3E8. **f** The  $IC_{50}$   
 558 values of 3E8 in blocking S1 or RBD binding to human ACE2 protein.  
 559

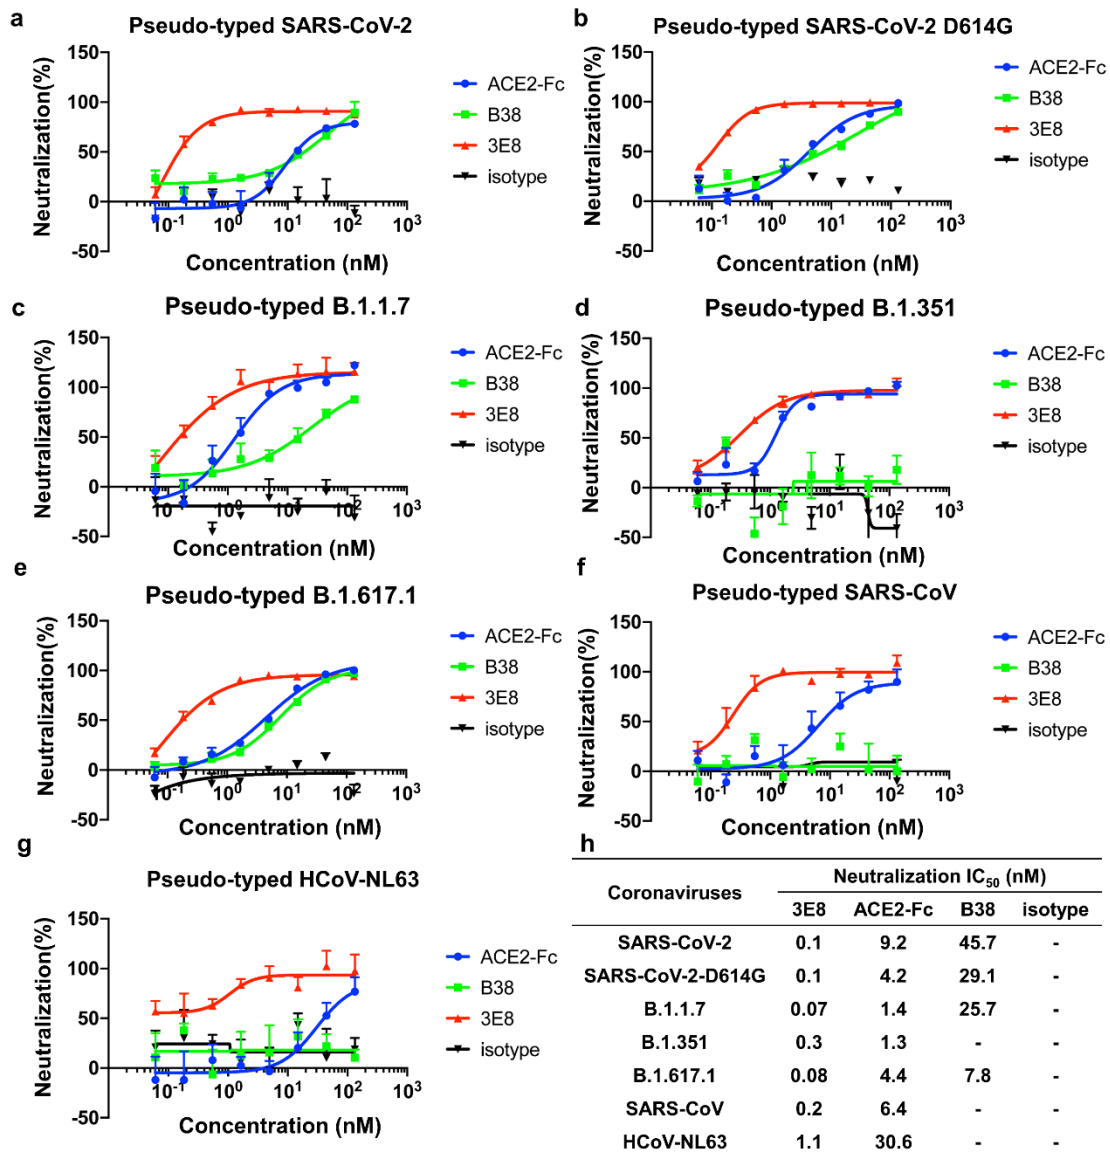

560 **Fig. 3.** 3E8 blocked the infections of ACE2-expressing cells by multiple pseudo-typed  
 561 coronaviruses. ACE2-Fc and B38 were used as positive controls, and human IgG4  
 562 isotype was negative control. **a-g** 3E8 blocked infections of ACE2-overexpressing  
 563 HEK293 cells by different pseudo-typed coronaviruses with Env-defective HIV-1 and  
 564 full-length S-proteins from SARS-CoV-2, SARS-CoV-2-D614G, B.1.1.7, B.1.351,  
 565 B.1.617.1, SARS-CoV and HCoV-NL63. **h** The  $IC_{50}$  values of 3E8 in blocking pseudo-  
 566 typed coronaviruses.

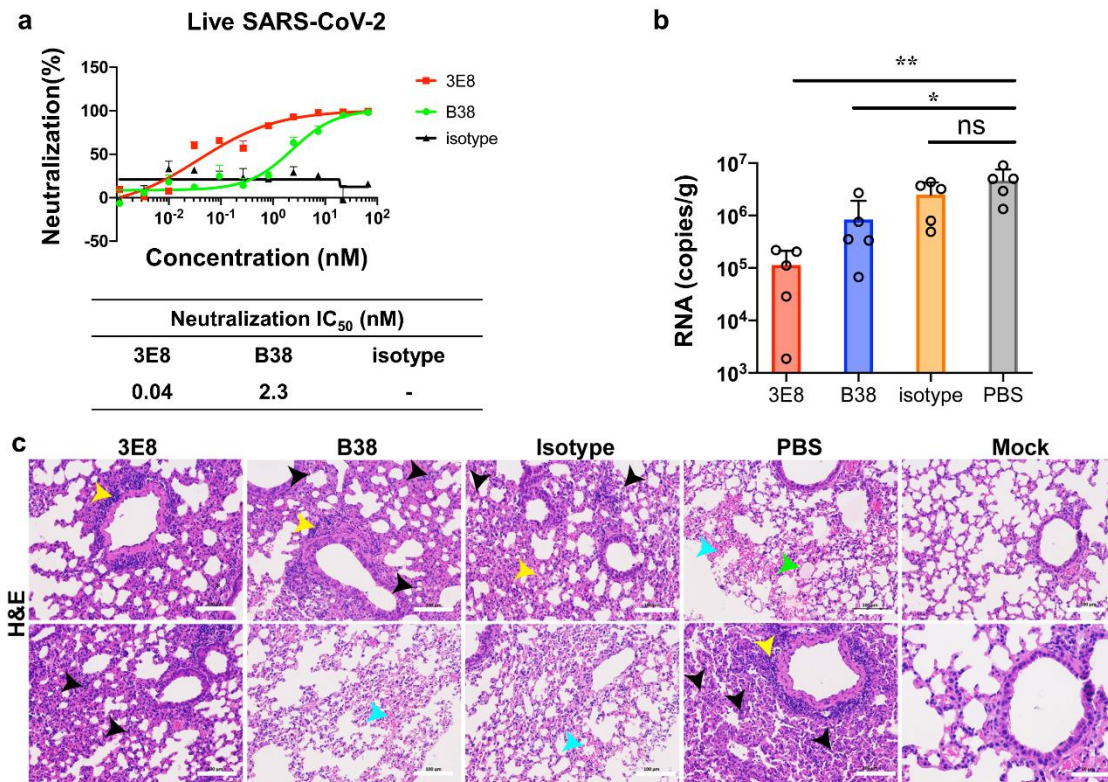

567 **Fig. 4.** 3E8 suppressed the infectivity of live SARS-CoV-2 in Vero E6 cells and a  
 568 mouse model of COVID-19. **a** 3E8 suppressed the infection of Vero E6 cells by live  
 569 SARS-CoV-2. **b** Application of 3E8 significantly reduced the viral RNA loads in the  
 570 lungs of BALB/c mice ectopically expressing human ACE2 and inoculated with live  
 571 SARS-CoV-2 virus. RBD-targeting monoclonal antibody B38 and isotype were used  
 572 as positive and negative controls, respectively. **c** H&E staining of lung organ samples  
 573 from different treatment groups. PBS- and isotype-treated mice developed serious  
 574 interstitial pneumonia characterized with large area of alveolar septal thickening, large  
 575 number of inflammatory cell infiltration (black arrow), even formed vascular cuff  
 576 around blood vessels (yellow arrow), bleeding areas (blue arrow), and material exudates  
 577 from the alveolar cavity (green arrow). B38-treated mice showed slightly-less  
 578 histological pneumonia than the two groups. Only inflammatory cell infiltration (black  
 579 arrow) and formed vascular cuff around blood vessels (yellow arrow) were observed in  
 580 the lungs of 3E8-treated mice. The scale represents 100  $\mu$ m. \*:  $p < 0.05$ ; \*\*:  $p < 0.01$ .



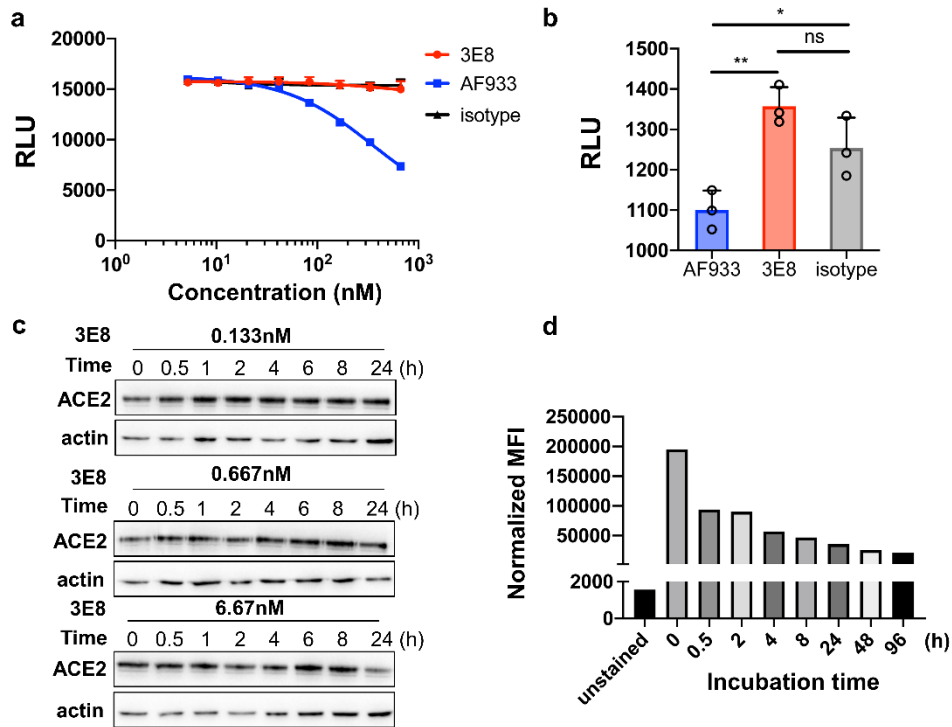

581 **Fig. 5.** 3E8 treatment had no effects on ACE2's physiological functions. **a** 3E8  
 582 treatment had no effects on enzymatic activities of recombinant human ACE2 protein.  
 583 AF933, an ACE2 polyclonal goat antibody, was used as positive control. hIgG1-Fc and  
 584 isotype were used as negative controls. **b** 3E8 treatment showed no effects on enzymatic  
 585 activities of ACE2 molecules endogenously expressed on the surface of Vero E6 cells.  
 586 **c** Total expression of ACE2 by Vero E6 cells was not affected by 3E8 treatment at  
 587 0.133, 0.667 or 6.67 nM for 24 h. **d** The levels of membrane ACE2 expression on  
 588 HEK293 cells were reduced by 3E8 treatment but were stabilized after 24 h. \*:  $p < 0.05$ ;  
 589 \*\*:  $p < 0.01$ .

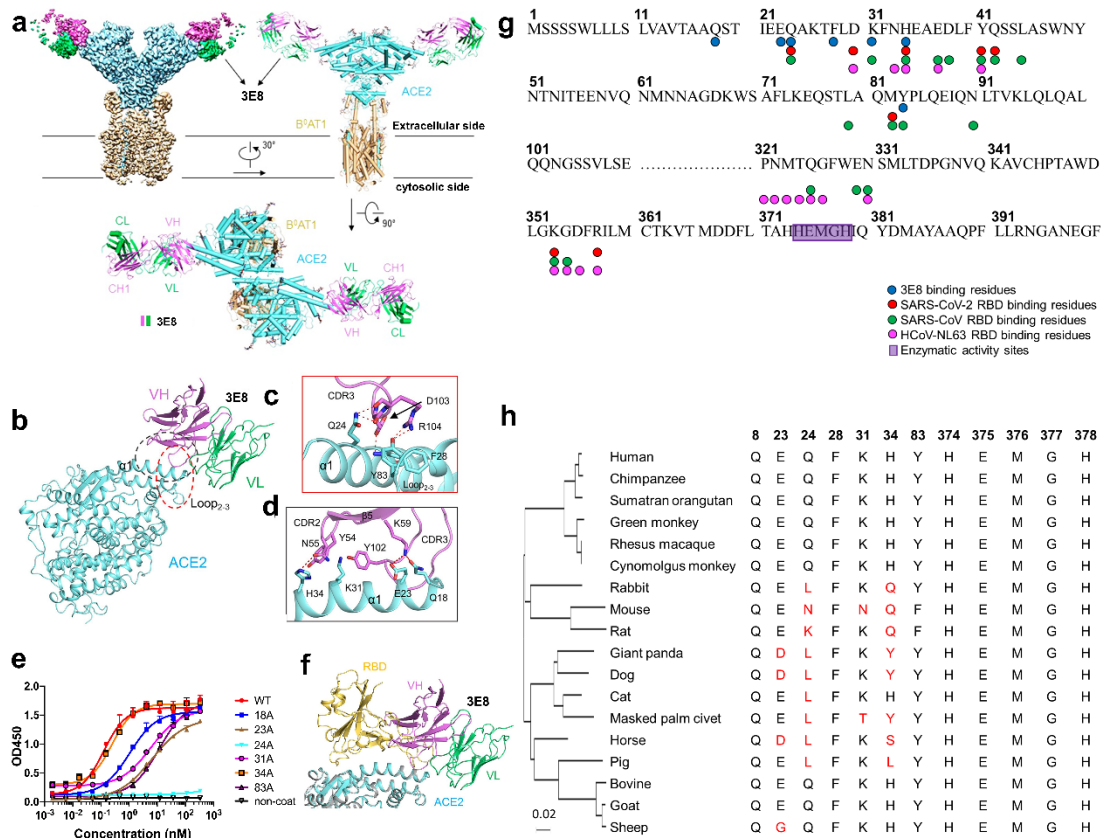

590 **Fig. 6 Cryo-EM structure of the 3E8/ACE2-B<sup>0</sup>AT1 complex and “alanine walk”**  
 591 **studies to solve the critical interactions between 3E8 and ACE2.** Domain-colored  
 592 cryo-EM map (**a**, upper left panel) and the side view (**a**, upper right panel) or the top  
 593 view (**a**, lower panel) of the structure. The heavy and light chains of 3E8 are colored  
 594 green and violet, respectively. The ACE2 and B<sup>0</sup>AT1 are colored cyan and wheat,  
 595 respectively. **b** Binding interface between 3E8 and ACE2, which contains two clusters  
 596 that are labeled with red and black dashed ellipses and detailed shown in **c** and **d**,  
 597 respectively. H-bonds are indicated by red dashed lines. Q (Gln) 24 and H (His)34 on  
 598 ACE2 were identified as critical amino acid residues interacting with the CDR3 and  
 599 CDR2 of heavy chain of 3E8, respectively. **e** “Alanine walk” identified Q24 on ACE2  
 600 as the most critical amino acid residue for 3E8 binding. **f** Structural alignment of the  
 601 3E8/ACE2-B<sup>0</sup>AT1 complex and the RBD/ACE2-B<sup>0</sup>AT1 complex (PDB ID: 6M17)  
 602 shows clash between 3E8 and RBD of the SARS-CoV-2 S protein. **g** Summary of

- 603 binding site of multiple coronaviruses on human ACE2. **h** Evolutionary tree of 3E8
- 604 binding site on ACE2 with different species.

## Supplementary Materials for

### ACE2-Targeting Monoclonal Antibody as Potent and Broad-Spectrum Coronavirus Blocker

Yuning Chen<sup>1,7,\*</sup>, Yanan Zhang<sup>2,7,\*</sup>, Renhong Yan<sup>3,\*</sup>, Guifeng Wang<sup>1,\*</sup>, Yuanyuan Zhang<sup>3</sup>, Zherui Zhang<sup>2,7</sup>, Yaning Li<sup>5</sup>, Jianxia Ou<sup>8</sup>, Wendi Chu<sup>1,7</sup>, Zhijuan Liang<sup>1,7</sup>, Yongmei Wang<sup>1,7</sup>, Yili Chen<sup>4</sup>, Ganjun Chen<sup>4</sup>, Qi Wang<sup>1</sup>, Qiang Zhou<sup>3†</sup>, Bo Zhang<sup>2,6†</sup>, Chunhe Wang<sup>1,4,7,8,9†</sup>

Chunhe Wang (wangc@simm.ac.cn), Bo Zhang (zhangbo@wh.iov.cn) or Qiang Zhou (zhouqiang@westlake.edu.cn).

#### **This PDF file includes:**

Additional Materials and Methods  
Figures. S1 to S6  
Table S1  
References and notes

## Materials and Methods

### Protein expression and purification

The His-tagged S1 proteins of SARS-CoV, HCoV-NL63, SARS-CoV-2, SARS-CoV-2 D614G, B.1.17, B.1.351, P.1 and the His-tagged RBD protein of B.1.617.1 were purchased from Sino Biological (Beijing, China). ACE2-his, ACE2-Fc and 3E8 were prepared as below: The DNA fragments encoding extracellular ACE2 domain (residues 19-740) from plasmid encoding full-length ACE2 (Sino Biological) were subcloned into the mammalian expression vectors pTT5 and pINFUSE (Vivogen, San Diego, CA) with C-terminal 6×His or hIgG1-Fc tags. The codon-optimized variable regions of the heavy and light chain of 3E8 were cloned into expression vectors containing human IgG4 constant regions. Purified plasmids were transfected into HEK293F cells (Shanghai Cell Line Bank, China) by polyethylenimine (Polysciences, Warrington, PA). Cells were then cultured in suspension in CD medium. After 5 days of culture, the supernatant was collected and purified by Ni-NTA or protein A chromatography. Size exclusion chromatography column (SEC) was used to examine the purity of proteins.

### Binding ELISA

96-well Immuno-plates (Greiner) were coated with 2.0 µg/ml of purified recombinant 6×His-tagged human ACE2 protein at 4°C overnight. After blocking at room temperature for 1 h with 1% casein (Thermo Fisher), plates were washed with PBS containing 0.05% Tween-20, and serial dilutions of 3E8 were added for 1 h incubation. After washing, goat anti-human IgG conjugated with HRP (AB Clonal Technology, 1:2000 dilution) was added and incubated for 1 h, then TMB substrate (Thermo Fisher Scientific) and 2 M of H<sub>2</sub>SO<sub>4</sub> were added, and OD<sub>450</sub> was detected with SpectraMax M5e (Molecular Devices) microplate reader. To measure the binding affinity of S1 proteins to ACE2, 2 µg/ml of various S1 proteins were coated onto plates followed by addition of gradient diluted ACE2-Fc, and goat anti-human IgG conjugated with HRP was used for detection.

## Flow Cytometry

Vero E6 and HEK293/ACE2/EGFP cells were harvested and aliquoted into FACS tubes at  $5 \times 10^5$  cells/tube. The cells were washed with cold staining buffer (PBS+0.1% BSA+0.04% Na<sub>3</sub>N) and then resuspended in 100  $\mu$ l of 3E8 at different concentrations. The cells were kept at 4°C in the dark for 1 h on a shaker before washed twice. The cells were resuspended in 100  $\mu$ L of staining buffer containing PE-goat-anti-human IgG (Biolegend) at 4  $\mu$ g/ml for 30 min. The cells were washed twice and resuspended in 200  $\mu$ l of staining buffer for flow cytometry analysis.

## Western Blot

Vero E6 cells were incubated at 37°C with different concentrations of 3E8 in DMEM with 10% FBS and lysed with commercial cell lysis buffer (Beyotime, Shanghai, China) at different time points. Western blot analysis for ACE2 protein in whole cell lysate was carried out using rabbit anti-ACE2 pAb (1:500, Sino biological) and goat anti-rabbit conjugated with HRP (1:2000, Abclonal, Wuhan, China) using a standard Western blot protocol.

## Cryo-EM sample preparation

The ACE2-B<sup>0</sup>AT1 complex was mixed with 3E8 at a molar ratio of 1:1.5 at 4 °C for 1hr before applied to the grids. Aliquots (3.3  $\mu$ l) of the protein complex were placed on glow-discharged holey carbon grids (Quantifoil Au R1.2/1.3). The grids were blotted for 2.5 s or 3.0 s and flash-frozen in liquid ethane cooled by liquid nitrogen with Vitrobot (Mark IV, Thermo Scientific). The cryo-EM samples were transferred to a Titan Krios operating at 300 kV equipped with Cs corrector, Gatan K3 Summit detector and GIF Quantum energy filter. Movie stacks were automatically collected using AutoEMation<sup>1</sup>, with a slit width of 20 eV on the energy filter and a defocus range from

-1.2  $\mu\text{m}$  to -2.2  $\mu\text{m}$  in super-resolution mode at a nominal magnification of 81,000 $\times$ . Each stack was exposed for 2.56 s with an exposure time of 0.08 s per frame, resulting in a total of 32 frames per stack. The total dose rate was approximately 50  $\text{e}^-/\text{\AA}^2$  for each stack. The stacks were motion corrected with MotionCor2<sup>2</sup> and binned 2-fold, resulting in a pixel size of 1.087  $\text{\AA}/\text{pixel}$ . Meanwhile, dose weighting was performed<sup>3</sup>. The defocus values were estimated with Gctf<sup>4</sup>.

### Cryo-EM data processing

Particles were automatically picked using Relion 3.0.6<sup>5-8</sup> from manually selected micrographs. After 2D classification with Relion, good particles were selected and subject to two cycle of heterogeneous refinement without symmetry using cryoSPARC<sup>9</sup>. The good particles were selected and subjected to Non-uniform Refinement (beta) with C1 symmetry, resulting in the 3D reconstruction for the whole structures, which was further subject to 3D classification, 3D auto-refinement and post-processing with Relion with C2 symmetry. To further improve the map quality for interface between 3E8 and ACE2-B<sup>0</sup>AT1 complex, the particles were C2-symmetry expanded and re-centered at the location of the interface between 3E8-ACE2 sub-complex. The re-extracted dataset was subject to focused refinement with Relion, resulting in the 3D reconstruction of better quality on the binding interface.

The resolution was estimated with the gold-standard Fourier shell correlation 0.143 criterion<sup>10</sup> with high-resolution noise substitution<sup>11</sup>. Refer to Supplementary Figures S4-S6 and Supplementary Table 1 for details of data collection and processing.

## Cryo-EM model building and structure refinement

For model building of 3E8 bound with ACE2-B<sup>0</sup>AT1 complex, the atomic model of the published structure S-ECD (PDB ID: 7C2L) and ACE2-B<sup>0</sup>AT1 complex (PDB ID: 6M18) were used as templates, which were molecular dynamics flexible fitted (MDFF)<sup>12</sup> into the whole cryo-EM map of the complex and the focused-refined cryo-EM map of the 3E8-ACE2 sub-complex, respectively. And the fitted atomic models were further manually adjusted with Coot<sup>13</sup>. Each residue was manually checked with the chemical properties taken into consideration during model building. Several segments, whose corresponding densities were invisible, were not modeled. Structural refinement was performed in Phenix<sup>14</sup> with secondary structure and geometry restraints to prevent overfitting. To monitor the potential overfitting, the model was refined against one of the two independent half maps from the gold-standard 3D refinement approach. Then, the refined model was tested against the other map. Statistics associated with data collection, 3D reconstruction and model building were summarized in supplementary Table 1.

## “Alanine walk” studies

To verify the key residues of ACE2 on binding with 3E8, Q18, E23, Q24, F28, K31, H34 and Y83 on ACE2 were changed into alanine using the overlapped PCR method with PrimeSTAR HS DNA Polymerase (Takara) and the following primers. Plasmids with mutation were expressed in mammalian expression system. After purification by Ni-NTA affinity chromatography, proteins were checked by SDS-PAGE and ELISA.



| Primers |   | Sequence                        |
|---------|---|---------------------------------|
| 18A     | F | GGGTGCACTCCGCGTCCACCATTG        |
|         | R | CAATGGTGGACGCGGAGTGCACCC        |
| 23A     | F | CCATTGAGGCACAGGCCAAGAC          |
|         | R | GTCTTGGCCTGTGCCTCAATGG          |
| 24A     | F | CATTGAGGAAGCGGCCAAGACATTTTTG    |
|         | R | CAAAAATGTCTTGGCCGCTTCCTCAATG    |
| 28A     | F | GGCCAAGACAGCGTTGGACAAGTTTAAC    |
|         | R | GTTAAACTTGTCCAACGCTGTCTTGGCC    |
| 31A     | F | GACATTTTTGGACGCGTTTAACCACGAAGC  |
|         | R | GCTTCGTGGTTAAACGCGTCCAAAAATGTC  |
| 34A     | F | CAAGTTTAACGCCGAAGCCGAAGAC       |
|         | R | GTCTTCGGCTTCGGCGTTAAACTTG       |
| 83A     | F | CTTGCCCAAATGGCGCCACTACAAGAAATTC |
|         | R | GAATTTCTTGTAGTGGCGCCATTGGGCAAG  |
| 34G     | F | CAAGTTTAACGGCGAAGCCGAAGAC       |
|         | R | GTCTTCGGCTTCGCCGTTAAACTTG       |
| 34W     | F | CAAGTTTAACTGGGAAGCCGAAGAC       |
|         | R | GTCTTCGGCTTCCCAGTTAAACTTG       |
| 34K     | F | CAAGTTTAACAAGGAAGCCGAAGAC       |
|         | R | GTCTTCGGCTTCCTTGTTAAACTTG       |
| 34D     | F | CAAGTTTAACGACGAAGCCGAAGAC       |
|         | R | GTCTTCGGCTTCGTCGTTAAACTTG       |

### Toxicity studies

Five-week-old male human ACE2 “knock-in” mice on C57BL/6 background were purchased from Shanghai Model Organisms Center (Shanghai). Animal handling and procedures were approved and performed according to the requirements of the Institutional Animal Care and Use Committee (IACUC) of Shanghai Institute of Materia Medica. Five male mice were randomized into two groups: 3E8 (3 mice, 9#, 66# and 86#) and isotype (2 mice, 68# and 39#). The mice received an intravenous (i.v.) injection of 100  $\mu$ l (30 mg/kg) of 3E8 or isotype. The mice were weighed and assessed

for behavioral changes at 0, 24, 72 and 144 h time points after injection. Toxicities was evaluated by body weight measuring, serum biochemistry and pathology studies. After 7 days of treatment, all mice were sacrificed by cervical dislocation. Blood, hearts, livers, spleens, lungs and kidneys were collected for biochemistry and pathology studies. Organs were fixed with 10% buffered formalin and subjected to paraffin embedding before sectioned, deparaffined, rehydrated and stained with Hematoxylin and Eosin (H&E) staining.

#### Statistical analysis

Data were shown as mean  $\pm$  SEM or SD. Statistical difference were calculated by Student's t-test, with  $*P < 0.05$  considered significant and  $P < 0.01$  highly significant.

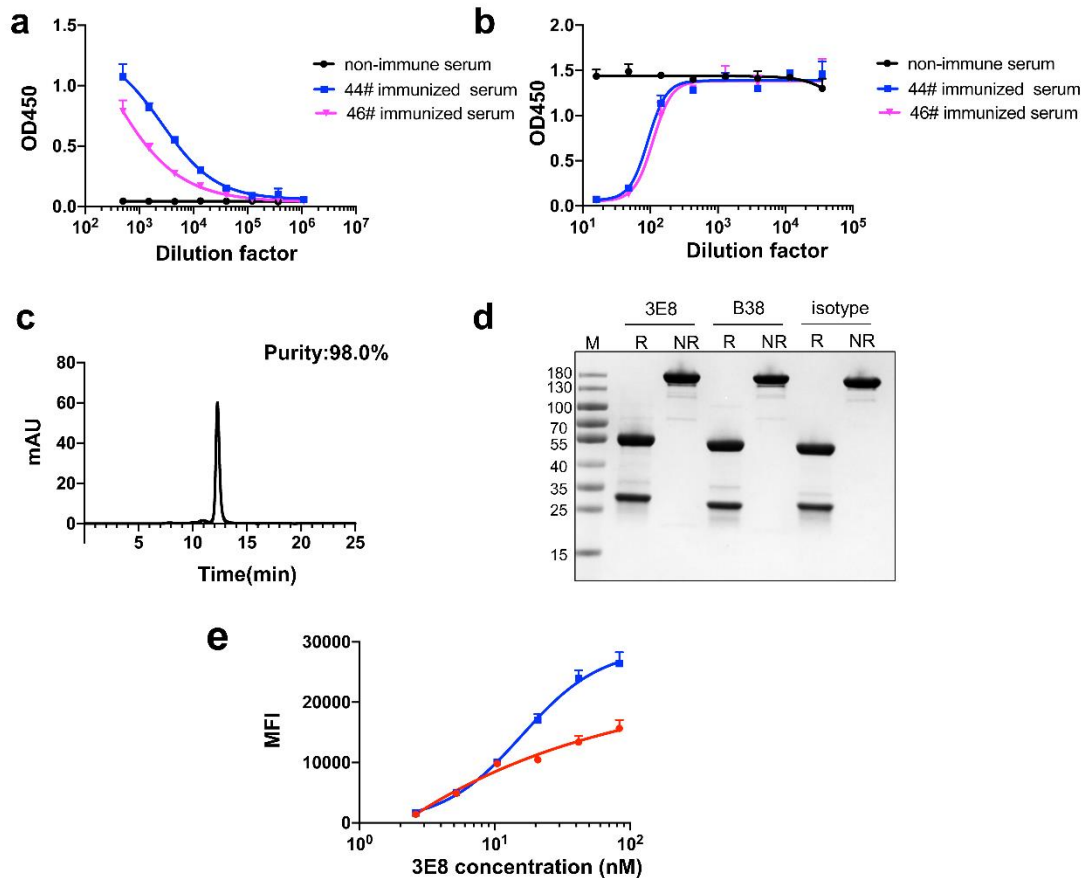

**Figure. S1.**

Bindings of immunized mice sera and purified 3E8 to recombinant human ACE2 protein. **a** Sera from ACE2-immunized mice bound to His-tagged recombinant human ACE2 protein. **b** Sera from ACE2-immunized mice blocked binding of SARS-CoV-2 S1-subunit to His-tagged recombinant ACE2 protein. 44# and 46# in A and B are individual immunized mice. **c** SEC profile of 3E8 on MAbPac SEC-1 column. The flow rate was 0.2 ml/min, the mobile phase was PBS buffer, and the monomer retention time was 12.28 min. **d** SDS-PAGE gels of the 3E8. R: reduced; NR: non-reduced. M: marker **e** Bindings of 3E8 to Vero E6 and HEK293 cells expressing human ACE2 measured as analyzed by flow cytometry.

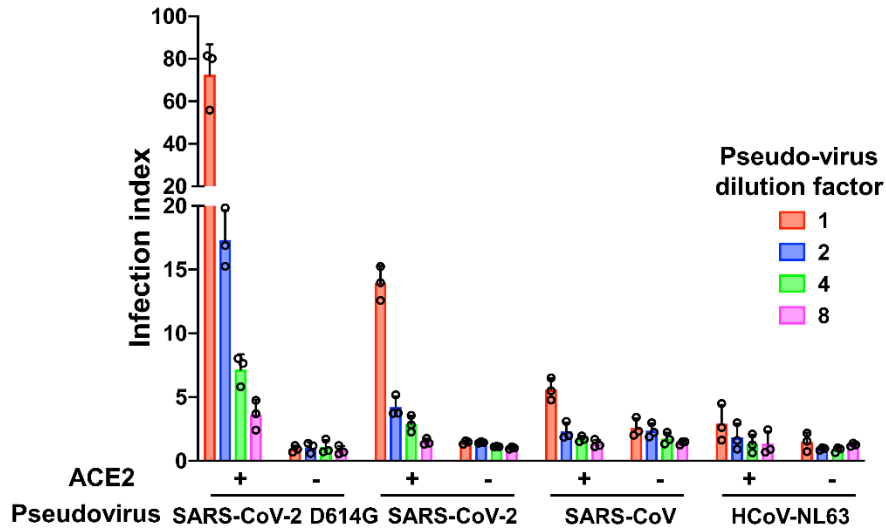

**Figure. S2.**

Infection of HEK293F/ACE2/EGFP cells by different pseudo-typed coronaviruses. Pseudo-typed SARS-CoV-2-D614G, SARS-CoV-2 (D614), SARS-CoV and HCoV-NL63 were constructed and infected HEK293 cells overexpressing human ACE2.

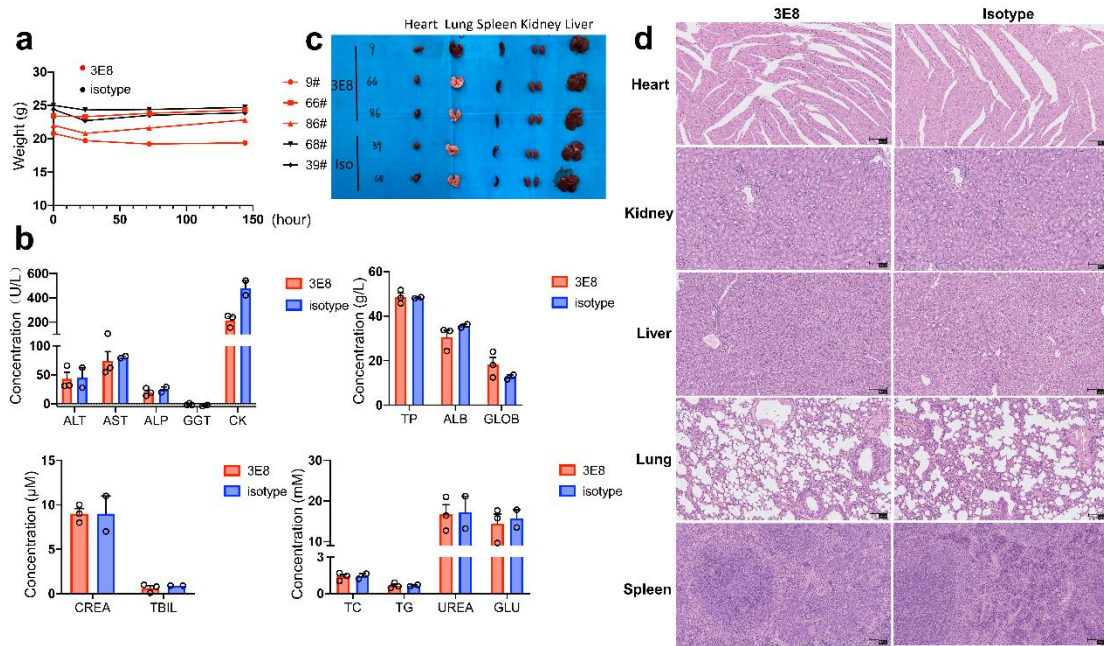

**Figure. S3.**

Toxicity studies of antibody 3E8 in human ACE2 “knock-in” mice.

**a** The body weights of the treated mice were measured at 0, 24, 72 and 144 h time points. **b** Blood biochemistry analysis showed the plasma concentrations of alanine transaminase (ALT), aspartate transaminase (AST), alkaline phosphatase (ALP), gamma-glutamyl transpeptidase (GGT), creatine kinase (CK), total protein (TP), albumin (ALB), globulin (GLOB), creatinine (CREA), total bilirubin (TBIL), total cholesterol (TC), triglycerides (TG), urea nitrogen (UREA) and glucose (GLU). The indices of GGT and TBIL in 3E8 group and isotype group were below the normal range, but lowered levels are not signs of toxicity. **c** Shapes and sizes of major organs including hearts, livers, kidneys, spleens and lungs from mice 7 days post treatment. The organs were dissected out after the mice were sacrificed by cervical dislocation and then washed with PBS to clean out the blood. Blood clotting occurred in the lung of mouse 9# during the dissection process, which was determined technical. The mice

were otherwise normal. **d** H&E staining of hearts, livers, kidneys, spleens and lungs of treated mice. No obvious pathological changes were observed. The scale of ratio above represents 100  $\mu\text{m}$ .

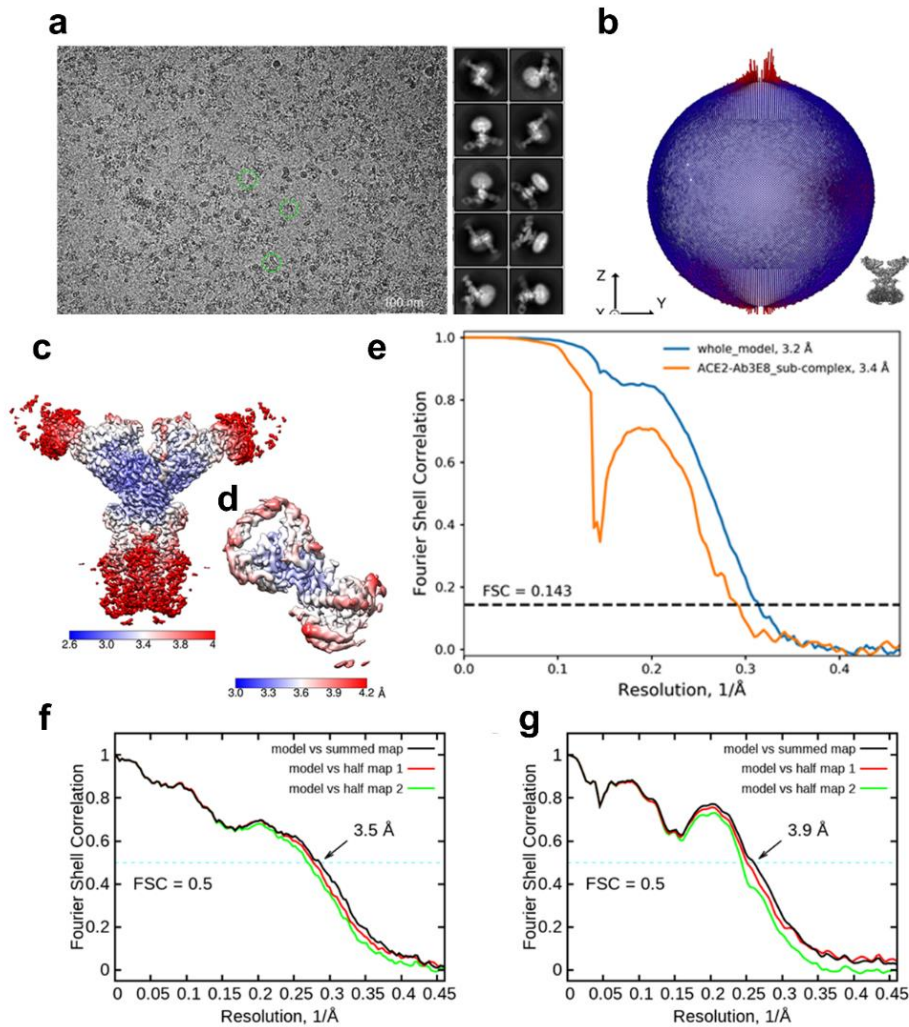

**Figure. S4.**

Cryo-EM analysis of 3E8 bound with ACE2-B<sup>0</sup>AT1 complex.

**a** Representative cryo-EM micrograph and 2D class averages of cryo-EM particle images. The scale bar in 2D class averages is 10 nm. **b** Euler angle distribution in the final 3D reconstruction of 3E8 bound with ACE2-B<sup>0</sup>AT1 complex. **c** and **d** Local resolution maps for the 3D reconstruction of overall structure and the 3E8-ACE2 sub-complex, respectively. **e** FSC curve of the overall structure (blue) and 3E8-ACE2 sub-complex (orange). **f** FSC curve of the refined model of 3E8 bound with ACE2-B<sup>0</sup>AT1 complex versus the overall structure that it is refined against (black); of the model refined against the first half map versus the same map (red); and of the model refined

against the first half map versus the second half map (green). The small difference between the red and green curves indicates that the refinement of the atomic coordinates is not enough overfitting. **g** FSC curve of the refined model of the 3E8-ACE2 sub-complex, which is the same as the **f**.



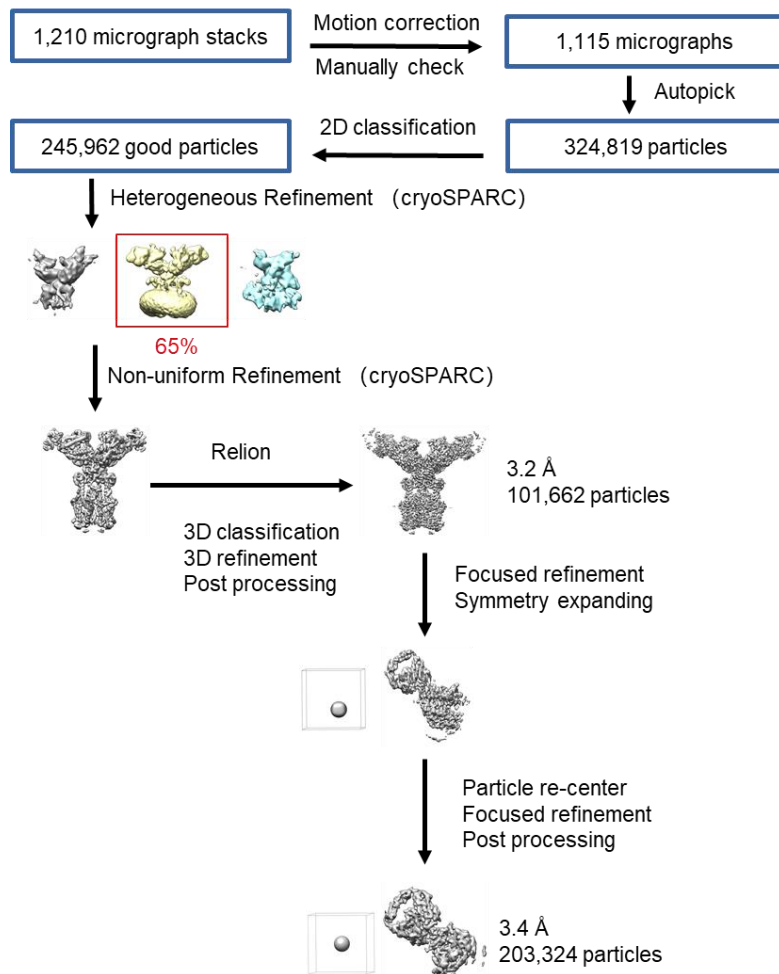

**Figure. S5.**

Flowchart for cryo-EM data processing. Please refer to the ‘Data Processing’ section in Methods for details.

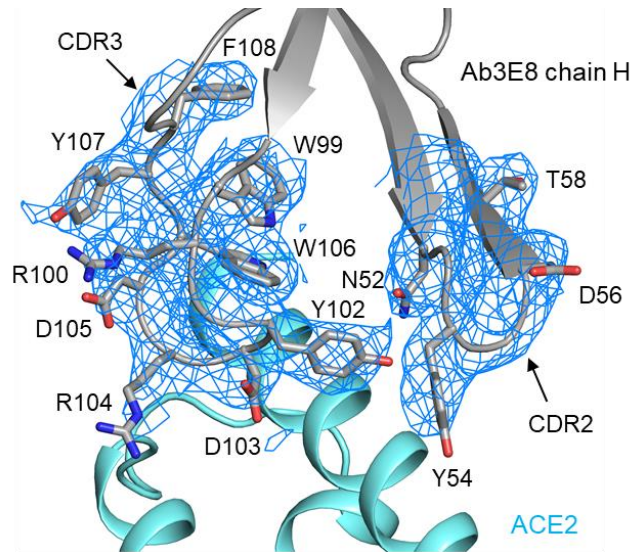

**Figure. S6.**

Representative cryo-EM map densities. Cryo-EM density of the interface between ACE2 and chain H of 4A8. The density is contoured at  $10 \sigma$ .

**Table S1.** Cryo-EM data collection and refinement statistics.

| <b>Data collection</b>                    |                                        |                                |
|-------------------------------------------|----------------------------------------|--------------------------------|
| EM equipment                              | Titan Krios (Thermo Fisher Scientific) |                                |
| Voltage (kV)                              | 300                                    |                                |
| Detector                                  | Gatan K3 Summit                        |                                |
| Energy filter                             | Gatan GIF Quantum, 20 eV slit          |                                |
| Pixel size (Å)                            | 1.077                                  |                                |
| Electron dose (e-/Å <sup>2</sup> )        | 50                                     |                                |
| Defocus range (µm)                        | -1.2 ~ -2.2                            |                                |
| Number of collected micrographs           | 1,210                                  |                                |
| Number of selected micrographs            | 1,115                                  |                                |
| Sample                                    | 3E8 bound with ACE2-B0AT1 complex      |                                |
| <b>3D Reconstruction</b>                  |                                        |                                |
|                                           | Whole model                            | Interface between 3E8 and ACE2 |
| Software                                  | cryoSPARC/<br>Relion                   | Relion                         |
| Number of used particles                  | 101,662                                | 203,324                        |
| Resolution (Å)                            | 3.2                                    | 3.4                            |
| Symmetry                                  | C2                                     | C1                             |
| Map sharpening B factor (Å <sup>2</sup> ) |                                        | -90                            |
| <b>Refinement</b>                         |                                        |                                |
| Software                                  |                                        | Phenix                         |
| Cell dimensions (Å)                       |                                        | 310.176                        |
| Model composition                         |                                        |                                |
| Protein residues                          |                                        | 3,586                          |
| Side chains assigned                      |                                        | 3,586                          |
| Sugar                                     |                                        | 38                             |
| Water                                     |                                        | 4                              |
| Zn                                        |                                        | 2                              |
| R.m.s deviations                          |                                        |                                |
| Bonds length (Å)                          |                                        | 0.010                          |
| Bonds Angle (°)                           |                                        | 1.027                          |
| Ramachandran plot statistics (%)          |                                        |                                |
| Preferred                                 |                                        | 91.53                          |
| Allowed                                   |                                        | 8.22                           |
| Outlier                                   |                                        | 0.25                           |

## References and Notes

- 1 Lei, J. & Frank, J. Automated acquisition of cryo-electron micrographs for single particle reconstruction on an FEI Tecnai electron microscope. *J Struct. Biol.* **150**, 69-80 (2005).
- 2 Zheng, S. Q. *et al.* MotionCor2: anisotropic correction of beam-induced motion for improved cryo-electron microscopy. *Nat. Methods* **14**, 331-332 (2017).
- 3 Grant, T. & Grigorieff, N. Measuring the optimal exposure for single particle cryo-EM using a 2.6 Å reconstruction of rotavirus VP6. *Elife* **4**, e06980 (2015).
- 4 Zhang, K. Gctf: Real-time CTF determination and correction. *J. Struct. Biol.* **193**, 1-12 (2016).
- 5 Zivanov, J. *et al.* New tools for automated high-resolution cryo-EM structure determination in RELION-3. *Elife* **7**, e42166 (2018).
- 6 Kimanius, D., Forsberg, B. O., Scheres, S. H. & Lindahl, E. Accelerated cryo-EM structure determination with parallelisation using GPUs in RELION-2. *Elife* **5**, e18722 (2016).
- 7 Scheres, S. H. RELION: implementation of a Bayesian approach to cryo-EM structure determination. *J. Struct. Biol.* **180**, 519-530 (2012).
- 8 Scheres, S. H. A Bayesian view on cryo-EM structure determination. *J. Mol. Biol.* **415**, 406-418 (2012).
- 9 Punjani, A., Rubinstein, J. L., Fleet, D. J. & Brubaker, M. A. cryoSPARC: algorithms for rapid unsupervised cryo-EM structure determination. *Nat. Methods* **14**, 290-296 (2017).
- 10 Rosenthal, P. B. & Henderson, R. Optimal determination of particle orientation, absolute hand, and contrast loss in single-particle electron cryomicroscopy. *J. Mol. Biol.* **333**, 721-745 (2003).
- 11 Chen, S. *et al.* High-resolution noise substitution to measure overfitting and validate resolution in 3D structure determination by single particle electron cryomicroscopy. *Ultramicroscopy* **135**, 24-35 (2013).
- 12 Trabuco, L. G., Villa, E., Mitra, K., Frank, J. & Schulten, K. Flexible fitting of atomic structures into electron microscopy maps using molecular dynamics. *Structure* **16**, 673-683 (2008).
- 13 Emsley, P., Lohkamp, B., Scott, W. G. & Cowtan, K. Features and development of Coot. *Acta Crystallogr D. Biol. Crystallogr.* **66**, 486-501 (2010).
- 14 Adams, P. D. *et al.* PHENIX: a comprehensive Python-based system for macromolecular structure solution. *Acta Crystallogr. D Biol. Crystallogr.* **66**, 213-221 (2010).
